# Supplementary figures and images for: Fabrication and in vivo chondrification of a poly(propylene carbonate)/l-lactide-grafted tetracalcium phosphate electrospun scaffold for cartilage tissue engineering
Source: Royal Society of Chemistry journal article supplement (doi:10.1039/c5ra04442a), 2015-01-01

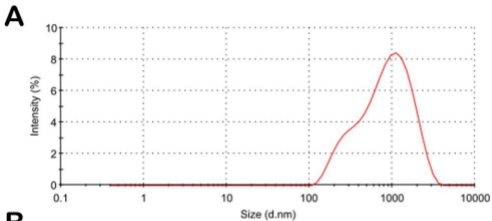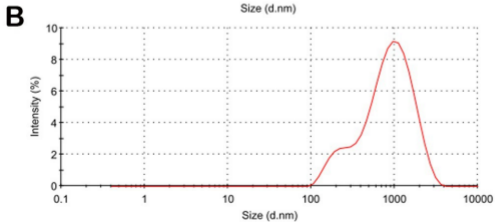

Supplement: c5ra04442a2.pdf [file c5ra04442a2.pdf]
